# Supplementary material
Source: Springer Nature journal article supplement (https://www.springermedizin.de/resource/supplementary/13058_2012_2989_MOESM9_ESM.pdf/9703038)

**A**

% CDH-1 positive cells

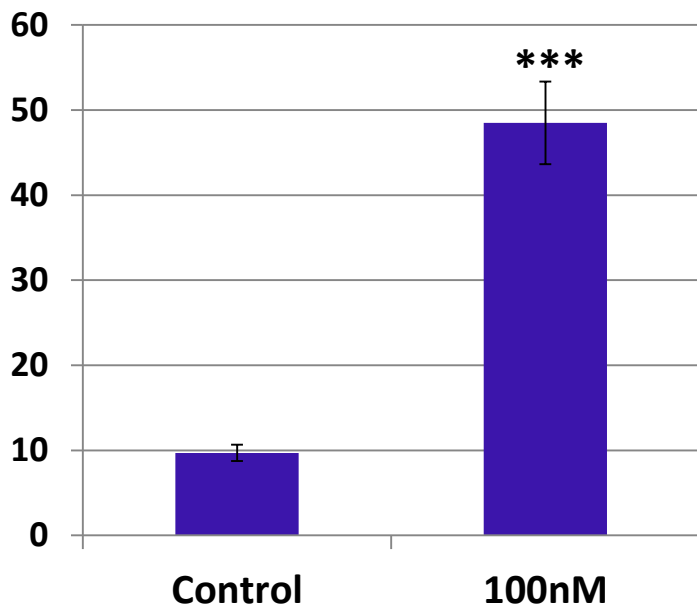**B**

CDH-1 (pg/ml)

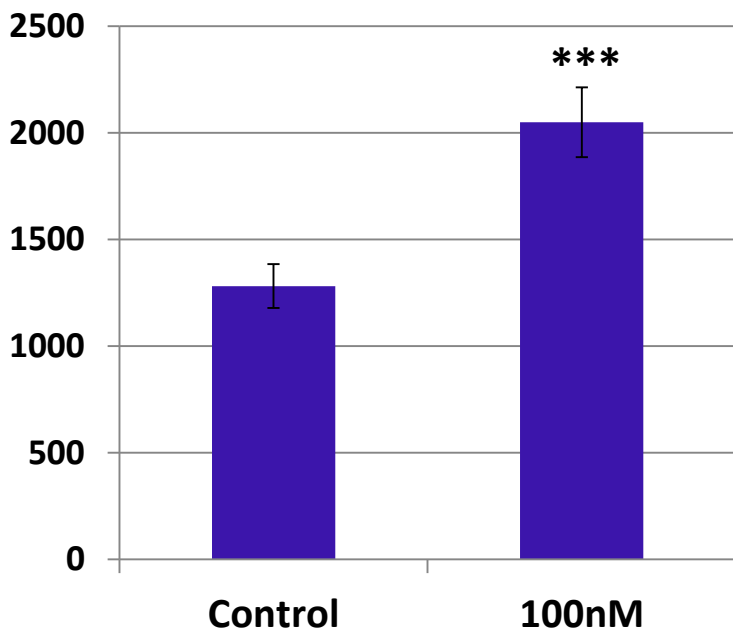**C**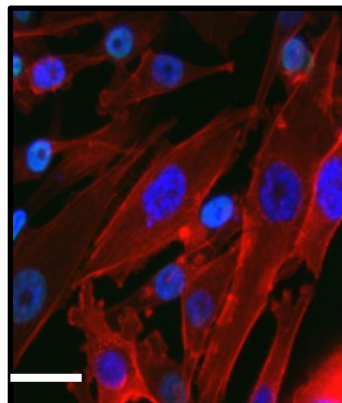

Control

**D**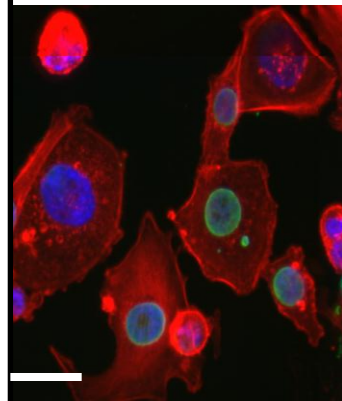

100nM

**E**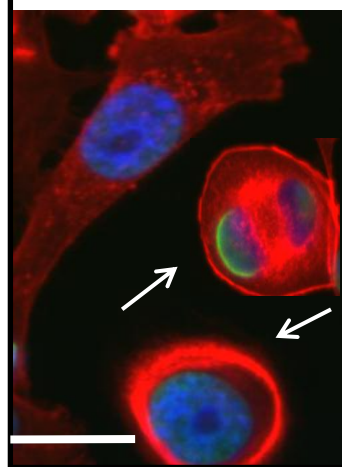

100nM

Supplement: MOESM9 [file 9703038]
